# Supplementary material for: Non-Host Plant Volatiles Disrupt Sex Pheromone Communication in a Specialist Herbivore
Source: PubMed Central journal article supplement (PMC5009357; doi:10.1038/srep32666), 2016-09-02
Supplement: srep32666-s1.pdf [file srep32666-s1.pdf]

## Supplementary information

### **Non-Host Plant Volatiles Disrupt Sex Pheromone**

#### **Communication in a Specialist Herbivore**

Fumin Wang<sup>1</sup>, Jianyu Deng<sup>1,\*</sup>, Coby Schal<sup>2,\*</sup>, Yonggen Lou<sup>3</sup>, Guoxin Zhou<sup>1</sup>,  
Bingbing Ye<sup>1</sup>, Xiaohui Yin<sup>1</sup>, Zhihong Xu<sup>1</sup>, Lize Shen<sup>1</sup>

<sup>1</sup>Department of Plant Protection, School of Agriculture and Food Science, Zhejiang Agriculture and Forestry University, Lin'an, Hangzhou, Zhejiang, 311300, China;

<sup>2</sup>Department of Entomology and W. M. Keck Center for Behavioral Biology, North Carolina State University, Campus Box 7613, Raleigh, NC 27695–7613, USA;

<sup>3</sup>National Key Laboratory of Rice Biology, Institute of Insect Science, Zhejiang University, Hangzhou, Zhejiang, 310058, China;

\*To whom correspondence should be addressed.

E-mail: [jydeng70@aliyun.com](mailto:jydeng70@aliyun.com) ; [coby@ncsu.edu](mailto:coby@ncsu.edu)

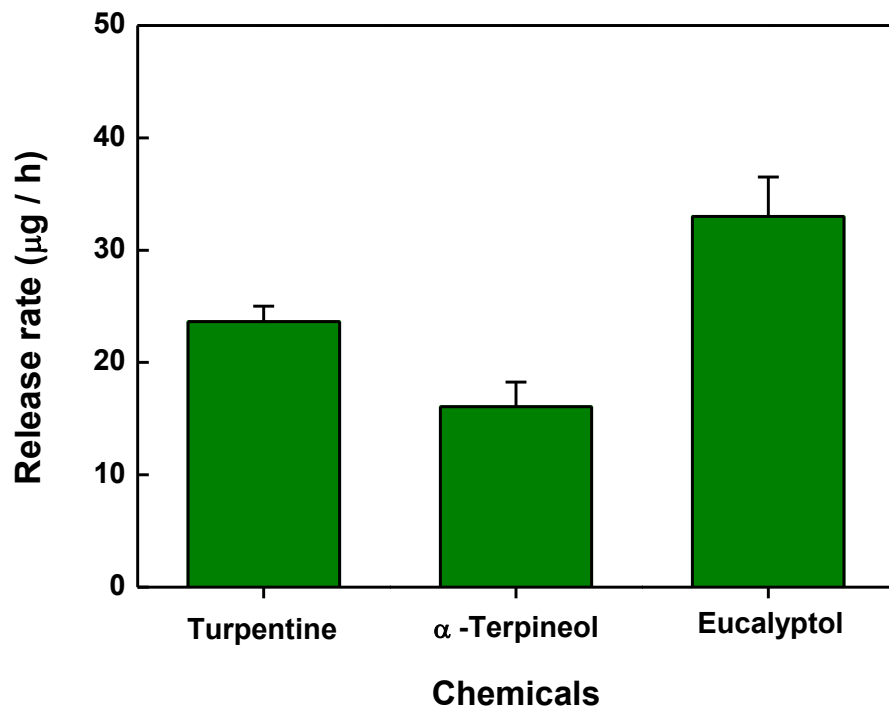

**Figure S1** Mean estimated release rates + SEM ( $N = 30$ ) of NHPVs loaded at  $1000 \mu\text{g}$  per rubber septum used in observations of calling behavior. Groups of 10 rubber septa were weighed together on an electronic balance (Mettler-Toledo,  $d = 0.0001 \text{ g}$ ). Release rates were calculated as mass loss of the rubber septa throughout the 11-h observation period (18:00 – 5:00).

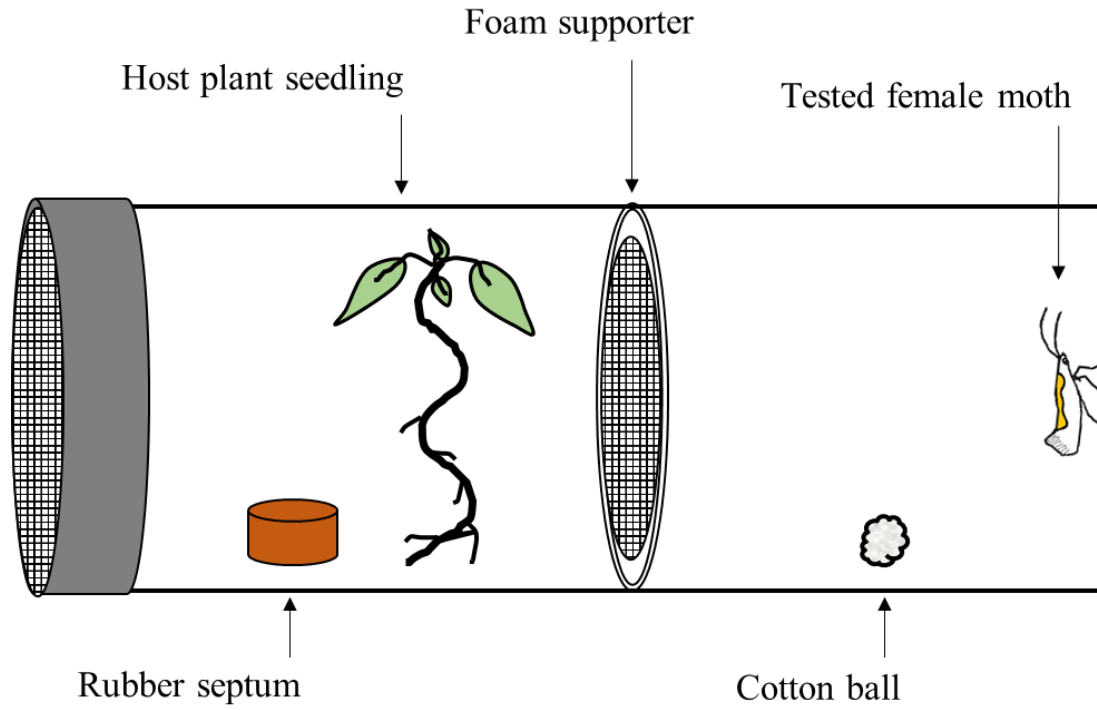

**Fig S2** Schematic diagram of arena utilized in observation of calling behavior of female diamondback moth. Odor sources and insect were compartmentalized by window screening supported by a foam loop.

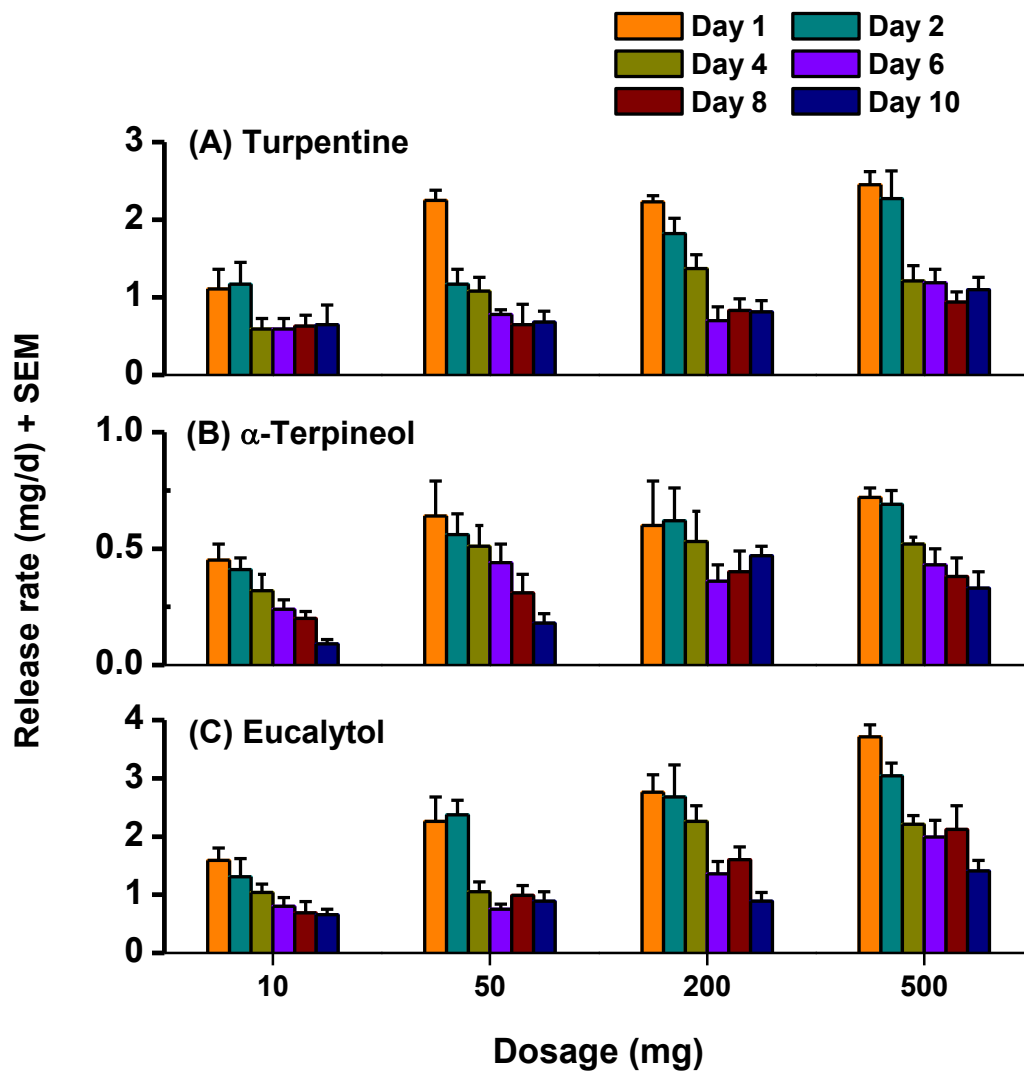

**Figure S3** Mean estimated release rates + SEM ( $n = 5$ ) of NHPVs in a Chinese cabbage (*Brassica rapa Linnaeus* var. *glabra* Regel) field. Release rates were calculated by the decreasing weights of polyethylene centrifuge tubes over consecutive days.
